# Supplementary material for: SPEEDS: A Portable Serological Testing Platform for Rapid Electrochemical Detection of SARS-CoV-2 Antibodies
Source: bioRxiv or medRxiv preprint supplement (doi:10.1101/2021.05.16.21256907), 2021-05-18
Supplement: Supplementary file [file media-1.pdf]

**Supplementary Information**

**SPEEDS: A Portable Serological Testing Platform for Rapid  
Electrochemical Detection of SARS-CoV-2 Antibodies**

Ran Peng<sup>1†</sup>, Yueyue Pan<sup>1†</sup>, Zhijie Li<sup>2</sup>, Zhen Qin<sup>1</sup>, James M. Rini<sup>2,3</sup>, Xinyu Liu<sup>1,4\*</sup>

<sup>1</sup> *Department of Mechanical and Industrial Engineering, University of Toronto, 5 King's College  
Road, Toronto, Ontario, Canada M5S 3G8*

<sup>2</sup> *Department of Molecular Genetics, University of Toronto, 361 University Ave, Toronto, Ontario,  
Canada M5G 1M1*

<sup>3</sup> *Department of Biochemistry, University of Toronto, 361 University Ave, Toronto, Ontario,  
Canada M5G 1M1*

<sup>4</sup> *Institute of Biomaterials and Biomedical Engineering, University of Toronto, 164 College Street,  
Toronto, Ontario, Canada M5S 3G9*

\*Corresponding author: Xinyu Liu, phone: +1-416-946-0558. e-mail: [xyliu@mie.utoronto.ca](mailto:xyliu@mie.utoronto.ca).

† These authors contributed equally to this work.

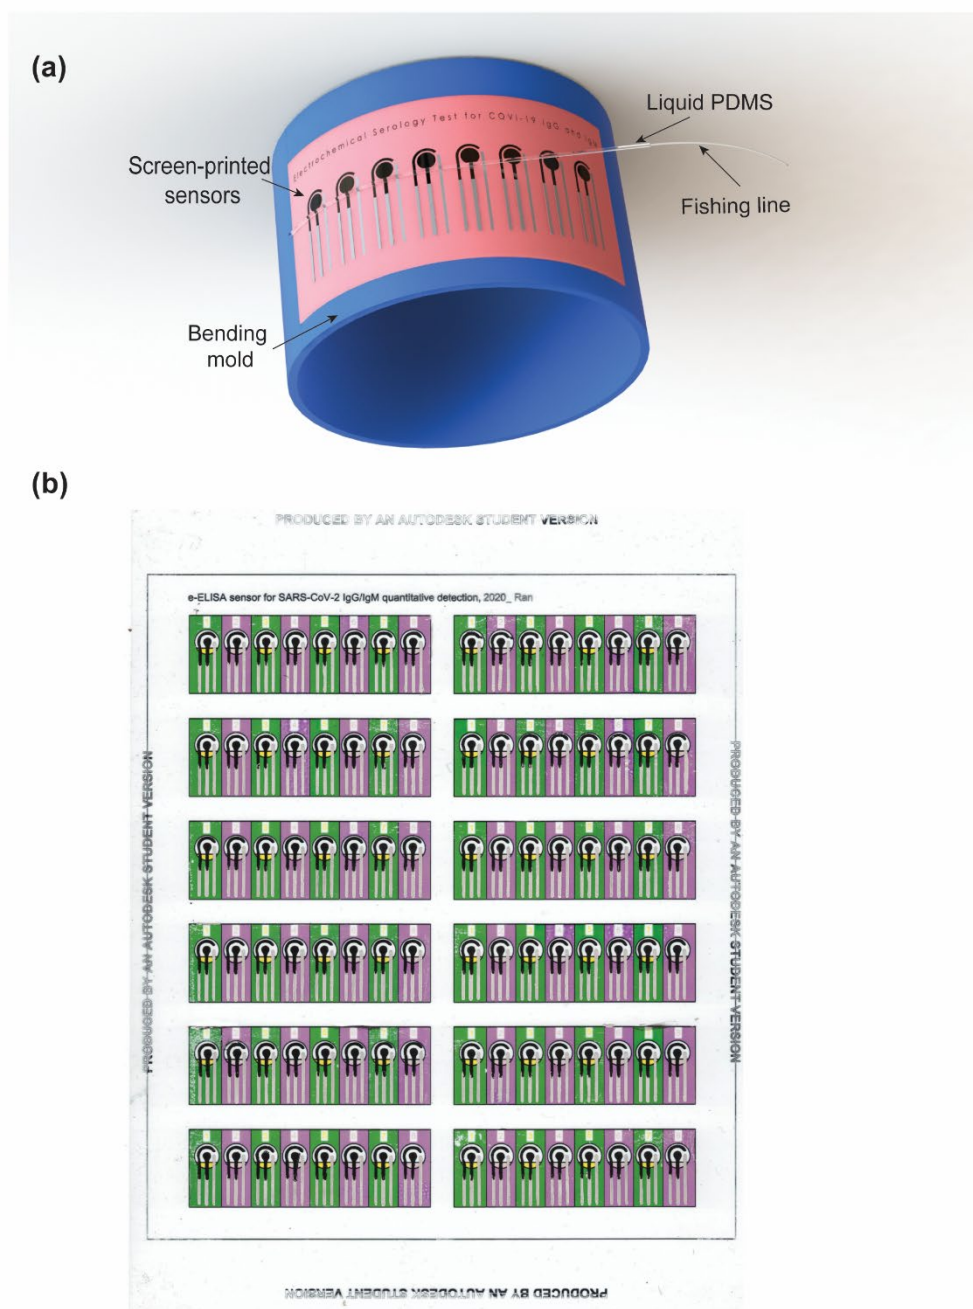

**Fig. S1.** Fabrication of the three-electrode electrochemical immunosensor. (a) A 3D model showing the process of PDMS barrier patterning. The reaction zone was defined by a wax-printed circle and a thin PDMS line barrier was printed at the intersection of the circular WE zone and its 'tail' connection. (b) A photograph of 96 immunosensors fabricated on a letter-sized PET film.

(a)

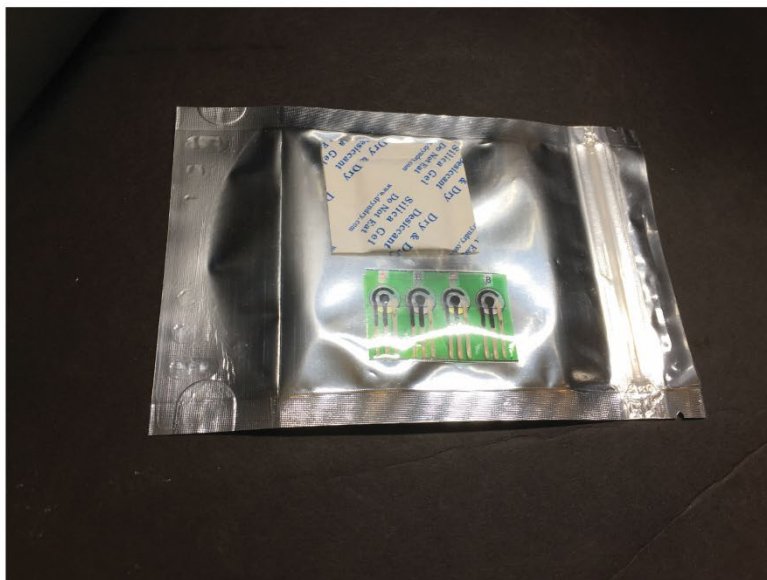

(b)

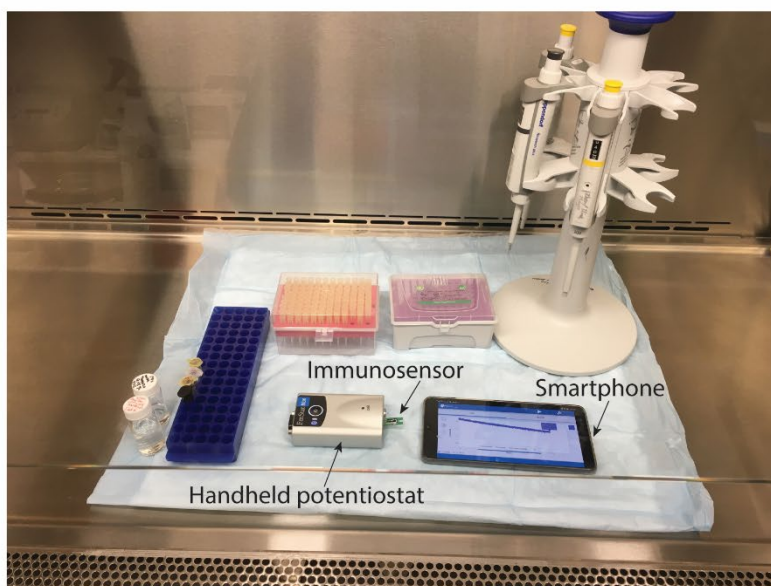

**Fig. S2.** (a) Four immunosensors stored in a nitrogen-infused airtight bag with desiccant inside. (b) The experimental setup for clinical sample testing inside a biosafety cabinet.

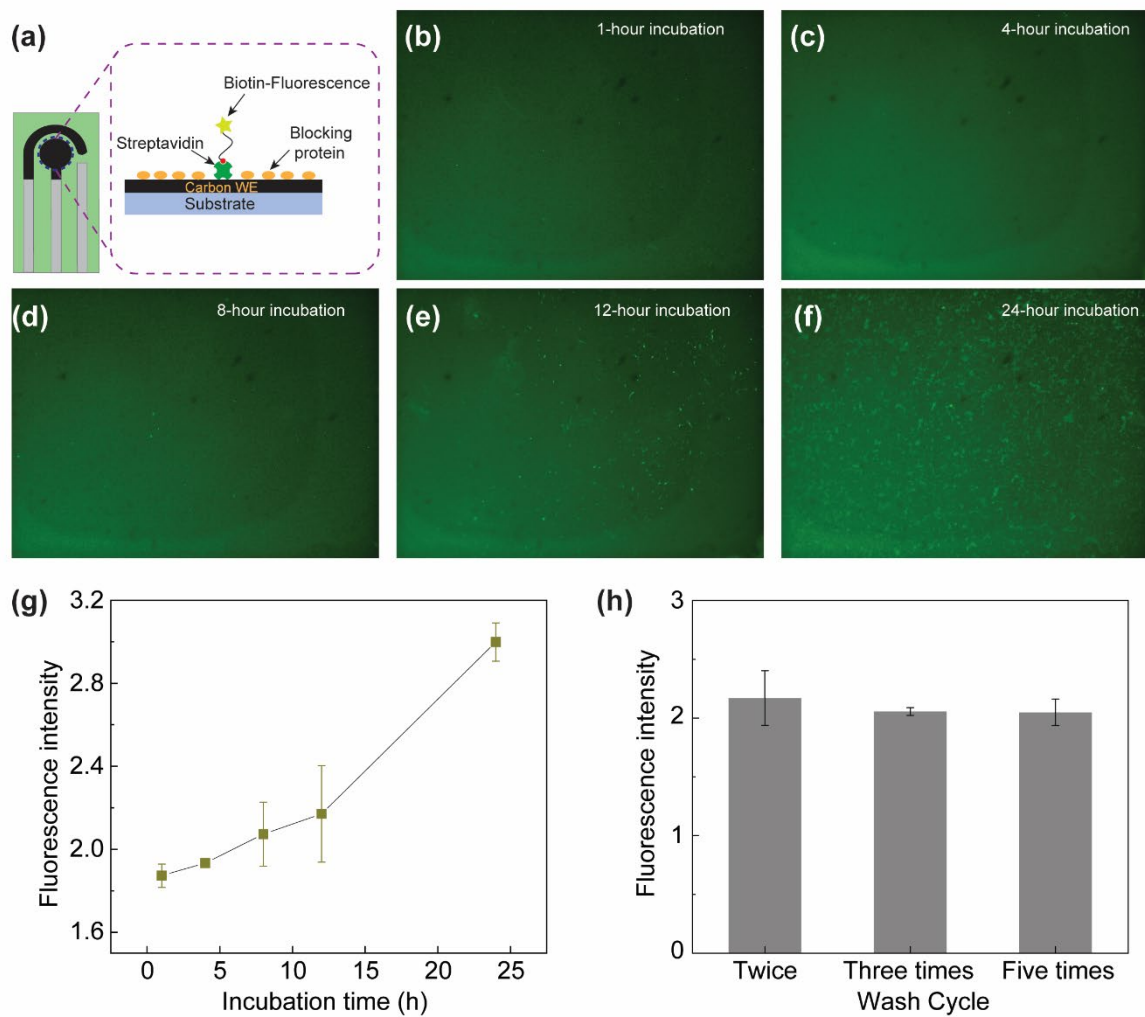

**Fig. S3.** Experimental determination of the incubation and washing conditions for SA immobilization on the WE. (a) The schematic of using biotinylated 5-fluorescein for testing the SA immobilization efficiency. The SA was absorbed on the WE and blocked by blocking proteins, and the fluorescein was captured by the SA and examined by a fluorescence microscope. (b-f) The fluorescence images of WEs, incubated with SA for (b) 1 h, (c) 4 h, (d) 8 h, (e) 12 h, and (f) 24 h, then labelled with biotin-5-fluorescein conjugate, and finally washed with PBS for three times. (g) Average fluorescence intensity of the WEs after SA incubation for different durations ( $n = 4$ ). (h) The fluorescence intensity of the WEs after SA incubation of 12 h, treated with biotin-5-fluorescein conjugate, and washed for twice, three and five times ( $n=4$ ).

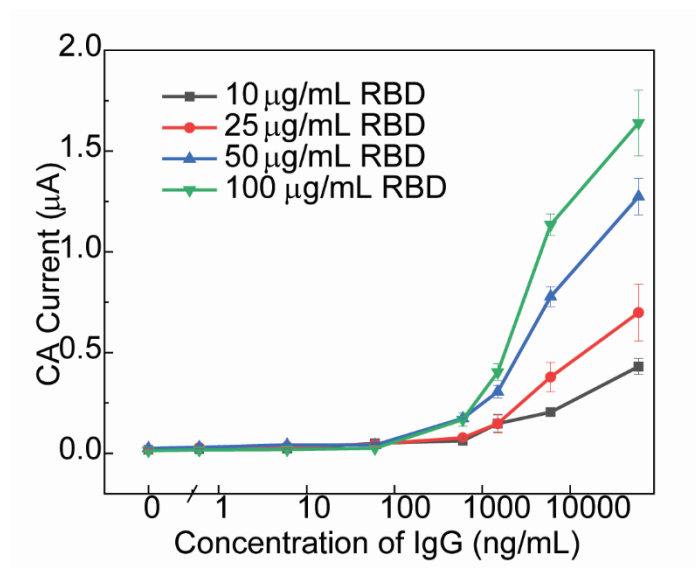

**Fig. S4.** Calibration curves of CR3022 IgG detection using spiked PBS on immunosensors prepared with four different concentrations of the biotinylated RBD capture probe (n=4). The variations of the CA current from different concentrations of RBD can be seen in the high concentration range (> 600 ng/mL).

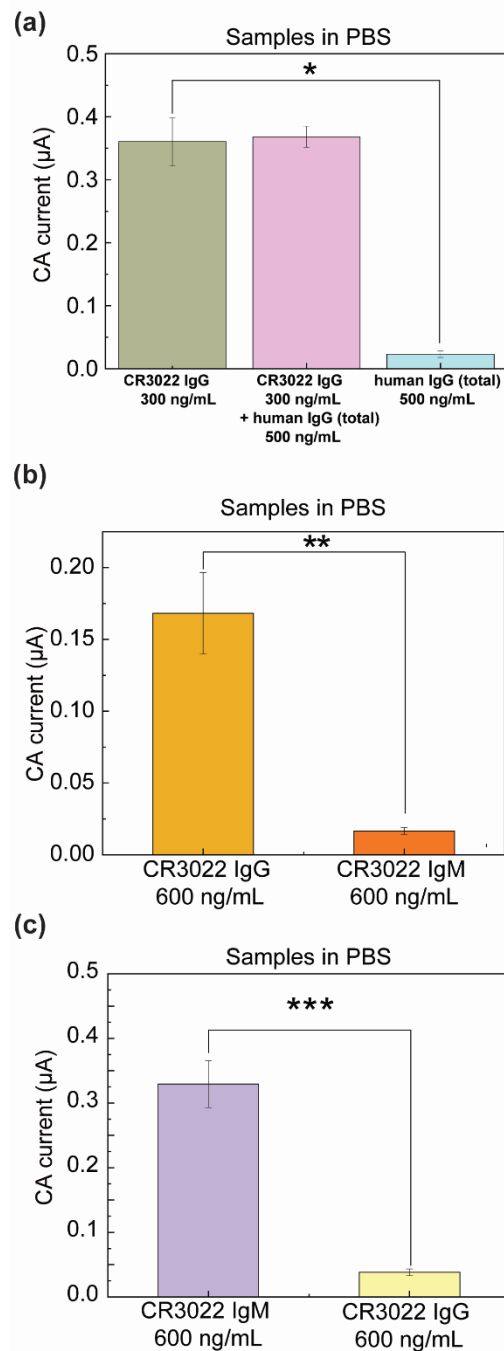

**Fig. S5.** The cross-reaction testing of anti-SARS-CoV-2 IgG and IgM detection in PBS (n=5). (a) The cross-reactivity data of CR3022 IgG detection using total human IgG as the interference protein. \* $p=4.72\times 10^{-8}$ . (b) The cross-reactivity data of CR3022 IgG detection using CR3022 IgM as the interference protein. \*\* $p$ -value= $2.29\times 10^{-6}$ ; (c) The cross-reactivity data of CR3022 IgM detection using CR3022 IgG as the interference protein. \*\*\* $p$ -value= $1.06\times 10^{-7}$ .

**Table S1.** The cost breakdown of one test.

| <b>Material</b>                            | <b>Cost for a single test (USD)</b> |
|--------------------------------------------|-------------------------------------|
| <b>PET film</b>                            | 0.00718                             |
| <b>Protection film</b>                     | 0.00124                             |
| <b>Airtight bags</b>                       | 0.0259                              |
| <b>Desiccants</b>                          | 0.00797                             |
| <b>Carbon ink</b>                          | 0.00957                             |
| <b>Ag/AgCl ink</b>                         | 0.120                               |
| <b>PDMS</b>                                | 0.0000167                           |
| <b>H<sub>2</sub>SO<sub>4</sub></b>         | 0.000360                            |
| <b>Streptavidin</b>                        | 0.391                               |
| <b>Biotinylated RBD</b>                    | 1.50                                |
| <b>Blocking reagent for ELISA</b>          | 0.00219                             |
| <b>Immunoassay stabilizer</b>              | 0.0174                              |
| <b>ALP-conjugated goat anti-human IgG/</b> | 0.0171                              |
| <b>ALP-conjugated goat anti-human IgM</b>  |                                     |
| <b>pAPP</b>                                | 0.00128                             |
| <b>Total cost</b>                          | 2.10                                |

**Table S2** Fitting parameters. The calibration curves under two detection modes are fitted with the Boltzmann model:  $y = f(x) = \frac{A_1 - A_2}{1 + e^{(x-x_0)/dx}} + A_2$ , where  $y$  is the CA current in amperes (A) and  $x$  is the concentration of antibody in ng/mL.

|                             | $A_1$                  | $A_2$                 | $x_0$               | $dx$               | $R^2$ |
|-----------------------------|------------------------|-----------------------|---------------------|--------------------|-------|
| IgG<br>calibration<br>curve | $-1.20 \times 10^{-4}$ | $1.91 \times 10^{-6}$ | $-1.15 \times 10^4$ | $2.75 \times 10^3$ | 0.981 |
| IgM<br>calibration<br>curve | $-2.79 \times 10^{-4}$ | $1.68 \times 10^{-6}$ | $-4.29 \times 10^4$ | $8.25 \times 10^3$ | 0.965 |



**Table S3** Testing results of five-fold-diluted human serum samples.

| Positive patient samples (CoV2+) | Days since symptom onset | Average IgG test CA current ( $\mu$ A) | IgG concentration (ng/mL) | Average IgM test CA current ( $\mu$ A) | IgM concentration (ng/mL) |
|----------------------------------|--------------------------|----------------------------------------|---------------------------|----------------------------------------|---------------------------|
| p1                               | 33                       | 0.503                                  | 731                       | 0.297                                  | 915                       |
| p2                               | 33                       | 0.266                                  | 297                       | 0.265                                  | 726                       |
| p3                               | 33                       | 0.953                                  | 1800                      | 0.27                                   | 758                       |
| p4                               | 33                       | 1.23                                   | 2760                      | 0.275                                  | 786                       |
| p5                               | 34                       | 1.11                                   | 2300                      | 0.564                                  | 2690                      |
| p6                               | 34                       | 0.99                                   | 1910                      | 0.401                                  | 1560                      |
| p7                               | 34                       | 0.479                                  | 683                       | 0.309                                  | 987                       |
| p8                               | 33                       | 0.47                                   | 666                       | 0.468                                  | 2010                      |
| p9                               | 34                       | 0.491                                  | 707                       | 0.29                                   | 876                       |
| p10                              | 34                       | 0.823                                  | 1450                      | 0.492                                  | 2180                      |
| p11                              | 34                       | 1.49                                   | 4060                      | 0.161                                  | 141                       |
| p12                              | 8                        | 0.357                                  | 455                       | 0.988                                  | 6640                      |
| p13                              | 1                        | 0.182                                  | 159                       | 0.136                                  | 4.41                      |
| p14                              | 4                        | 0.638                                  | 1010                      | 0.250                                  | 641                       |
| p15                              | 33                       | 0.416                                  | 564                       | 0.184                                  | 265                       |
| p16                              | 33                       | 0.333                                  | 414                       | 0.582                                  | 2830                      |
| p17                              | 33                       | 0.929                                  | 1730                      | 0.522                                  | 2380                      |
| p18                              | 9                        | 0.694                                  | 1130                      | 0.457                                  | 1940                      |
| p19                              | 30                       | 0.336                                  | 419                       | 0.222                                  | 479                       |
| p20                              | 35                       | 1.09                                   | 2230                      | 0.824                                  | 4890                      |
| Negative patient samples (CoV2-) |                          |                                        |                           |                                        |                           |
| n1                               | N/A                      | 0.129                                  | N/A                       | 0.135                                  | N/A                       |
| n2                               | N/A                      | 0.0715                                 | N/A                       | 0.167                                  | N/A                       |
| n3                               | N/A                      | 0.132                                  | N/A                       | 0.165                                  | N/A                       |
| n4                               | N/A                      | 0.154                                  | N/A                       | 0.148                                  | N/A                       |
| n5                               | N/A                      | 0.144                                  | N/A                       | 0.180                                  | N/A                       |
| n6                               | N/A                      | 0.0683                                 | N/A                       | 0.171                                  | N/A                       |
| n7                               | N/A                      | 0.0865                                 | N/A                       | 0.068                                  | N/A                       |
| n8                               | N/A                      | 0.168                                  | N/A                       | 0.157                                  | N/A                       |
| n9                               | N/A                      | 0.171                                  | N/A                       | 0.144                                  | N/A                       |
| n10                              | N/A                      | 0.152                                  | N/A                       | 0.142                                  | N/A                       |
